RESEARCH ARTICLE

# Clustering of four major lifestyle risk factors among Korean adults with metabolic syndrome

Shin Ha<sup>1,2</sup>, Hui Ran Choi<sup>3</sup>, Yo Han Lee<sup>4\*</sup>

**1** Department of Public Health, Graduate school of Korea University, Seoul, South Korea, **2** Services Department, Medical Library, Korea University, Seoul, South Korea, **3** Division of Family Medicine, Seoul National University Graduate School of Medicine, Seoul, South Korea, **4** Department of Preventive Medicine, Konyang University College of Medicine, Daejeon, South Korea

\* [vionic@konyang.ac.kr](mailto:vionic@konyang.ac.kr)

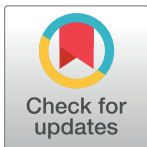

## Abstract

The purpose of this study was to investigate the clustering pattern of four major lifestyle risk factors—smoking, heavy drinking, poor diet, and physical inactivity—among people with metabolic syndrome in South Korea. There were 2,469 adults with metabolic syndrome aged 30 years or older available with the 5th Korean National Health and Nutrition Examination Survey dataset. We calculated the ratio of the observed to expected (O/E) prevalence for the 16 different combinations and the prevalence odds ratios (POR) of four lifestyle risk factors. The four lifestyle risk factors tended to cluster in specific multiple combinations. Smoking and heavy drinking was clustered (POR: 1.86 for male, 4.46 for female), heavy drinking and poor diet were clustered (POR: 1.38 for male, 1.74 for female), and smoking and physical inactivity were also clustered (POR: 1.48 for male). Those who were male, younger, low-educated and living alone were much more likely to have a higher number of lifestyle risk factors. Some helpful implications can be drawn from the knowledge on clustering pattern of lifestyle risk factors for more effective intervention program targeting metabolic syndrome.

## OPEN ACCESS

**Citation:** Ha S, Choi HR, Lee YH (2017) Clustering of four major lifestyle risk factors among Korean adults with metabolic syndrome. PLoS ONE 12(3): e0174567. <https://doi.org/10.1371/journal.pone.0174567>

**Editor:** Tatsuo Shimosawa, The University of Tokyo, JAPAN

**Received:** December 19, 2016

**Accepted:** March 12, 2017

**Published:** March 28, 2017

**Copyright:** © 2017 Ha et al. This is an open access article distributed under the terms of the [Creative Commons Attribution License](https://creativecommons.org/licenses/by/4.0/), which permits unrestricted use, distribution, and reproduction in any medium, provided the original author and source are credited.

**Data Availability Statement:** All data are available from the fifth Korea National Health and Nutrition Examination Survey. The data can be obtained at the following link: [knhanes.cdc.go.kr](http://knhanes.cdc.go.kr).

**Funding:** The authors received no specific funding for this work.

**Competing interests:** The authors have declared that no competing interests exist.

## Introduction

Metabolic syndrome is a clustering of cardio-metabolic risk factors. People with metabolic syndrome are much more likely to have cardiovascular disease (CVD) and type 2 diabetes, respectively than people without metabolic syndrome [1–3]. The prevalence of metabolic syndrome has steadily increased and is now a serious public health concern in developed countries [4,5].

There is definite epidemiological evidence that major four lifestyle risk factors such as smoking, heavy drinking, poor diet, and physical inactivity contribute to the development of metabolic syndrome and chronic diseases [6,7]. Researches also suggest that these lifestyle risk factors are not randomly distributed, but that they tend to cluster with other unhealthy behaviors within individuals [8,9]. In other words, certain combinations of lifestyle risk factors is

more prevalent than can be expected based on the prevalence of individual lifestyle risk factors.

Although there have been several studies on the clustering of multiple lifestyle risk factors in the general population [8–10], very little efforts for obtaining relevant information on people with metabolic syndrome had been done. Knowledge on unhealthy behavior pattern of people with metabolic syndrome is considered crucial for creating a tailored lifestyle intervention program and a tailored regimen might help patients with metabolic syndrome to be motivated to change unhealthy behaviors [11,12]. The purpose of this study was to investigate the clustering pattern of four major lifestyle risk factors—smoking, heavy drinking, poor diet, and physical inactivity—among people with metabolic syndrome in South Korea.

## Methods

### Study population

Data for this study were drawn from the population-based, nationwide cross-sectional study of the 5th Korean National Health and Nutrition Examination Survey (KNHANES) 2010–2012, which was conducted by the Korea Centers for Disease Control and Prevention (KCDC). A multistage, stratified, probability sampling approach was used with selections made from sampling units based on gender, age group and geographical area using household registries. The methods have already been detailed in previous articles [13,14].

There were 2,918 adults with metabolic syndrome aged 30 years or older available with the 5th KNHANES dataset. We excluded 449 subjects who had missing data for any of four lifestyle risk factors. Finally, 2,469 participants were included in the analyses. The American Heart Association/National Heart, Lung, and Blood Institute Scientific Statement defined the criteria for metabolic syndrome in Asians as follows and the criteria was applied for this study [1]. Subjects with 3 or more of the following 5 metabolic derangements were defined as having metabolic syndrome: abdominal obesity more than 90 cm in men and more than 80 cm in women, blood pressure more than 130/85 mm Hg or the use of an antihypertensive drug, fasting glucose more than 100 mg/dL or the use of an antidiabetic drug, a high-density lipoprotein cholesterol level less than 40 mg/dL in men and 50 mg/dL in women or the use of an antidiabetic drug, and a high-density lipoprotein cholesterol level more than 150 mg/dL or use of an antidiabetic drug.

Written informed consent was provided by all participants, and the protocol for the survey was approved by the Institutional Review Board of the KCDC (2010-02CON-21-C, 2011-02CON-06-C, 2012-01EXP-01-2C). The current study did not require additional ethical approval because the KNHANES dataset is publicly available.

### Measurements

Data on smoking status, alcohol intake, dietary intake and physical activity were self-reported. Smoking status was divided into two categories: current smoker and ex- or never-smoker. Heavy drinking was defined as alcohol intake  $\geq 5$  glasses for male and  $\geq 4$  glasses for female subjects on one occasion  $\geq$  once a week. The definition of physical inactivity was adapted from the International Physical Activity Questionnaire (IPAQ) category 1 in which no activity is reported or some activity is reported but not enough to meet an equivalent of 30 min of at least moderate intensity physical activity on  $>3$  days per week [15,16]. Dietary intake was assessed by the 24-h dietary recall method. Poor dietary patterns were defined as having one or two of the following two components: fat intake exceeding 30% of the total number of calories, and sodium intake exceeding 30% of the average daily intake of Koreans. Socioeconomic factors such as income, education level, marital status and job state were used for analysis.

## Statistical analyses

The analyses in this study consisted of three parts. First, we calculated the ratio of the observed to expected (O/E) prevalence for the 16 different combinations of four lifestyle risk factors. O/E ratio presents both the magnitude and direction of the association, with values above 1 meaning positive association and below 1 an inverse association [17]. The more the ratio deviates from 1, the stronger the behaviors are associated. In other words, clustering exists when the observed prevalence of a certain combination of lifestyle risk factors exceeds the expected prevalence of the combination.

Second, we examined the associations between sets of two lifestyle risk factors by calculating the prevalence odds ratios (POR) and statistically tested by Chi-square tests. If the 95% confidence interval of the POR does not include 1, it indicates clustering between the two lifestyle risk factors. The POR was calculated as follows:  $POR = (\text{number of respondents without both risk factors}) \div (\text{number of respondents with the one risk factor} \times \text{number of respondents with the other risk factor})$ . Analyses were performed separately for male and female subjects for the former two parts of analyses because the prevalence of smoking, heavy drinking, and poor diet were substantially different for male and female subjects.

Third, we examined the sociodemographic patterns in the presence of multiple lifestyle risk factors. Multinomial logistic regression model was used to evaluate the association between sociodemographic variables and the dependent variable, the number of lifestyle risk factors, ranging from 0 to 4. The model allows us to estimate the probability that a respondent has a certain number of lifestyle risk factors (1, 2, 3, and 4) compared to the reference groups of having no risk factors. All analyses were carried out using Stata 11.1 (StataCorp, College Station, TX, USA).

## Results

[Table 1](#) shows the characteristics of the study population. Compared with male subjects, females tended to be older, in the lower income, less educated, living alone, and not employed. Males were highly likely to be smokers, heavy drinkers, and to have poor diet than female subjects, whereas the prevalence of physical inactivity was similar in both sexes. Of the males, 11% had no lifestyle risk factor, 26% had one, 37% had two, and 26% had simultaneously three or more lifestyle risk factors. Meanwhile, more than 80% of female participants had nothing or only one lifestyle risk factor.

[Table 2](#) shows the observed and expected prevalence of all 16 possible combinations of the four lifestyle risk factors. In males, clustering was found at both ends of the lifestyle spectrum. In other words, the observed prevalence of having no, and having all four lifestyle risk factors was higher than could have been expected (O/E ratio 1.45 and 1.35, respectively) on the basis of the individual probabilities of the four risk factors alone. The observed prevalence of specific combinations such as smoking + heavy drinking + poor diet or smoking + heavy drinking + physical inactivity was higher than could have been expected. Since about 80% of the female participants had one or no risk factors, the prevalence of the majority of combinations were very low, and thus this made it difficult to interpret the O/E ratios for female subjects.

[Table 3](#) shows the POR of combinations of two lifestyle risk factors. The overall pattern of clustering was similar for males and females. Clustering of smoking with heavy drinking was observed (POR 1.86 for male and 4.46 for female subjects). In addition, heavy drinking and poor diet were clustered in both sexes. In other words, the participants who smoke are more likely have heavy drinking, and the participants who drink heavily are more likely have poor diet. In male participants, smoking and physical inactivity were also clustered showing POR with 1.48.

**Table 1. Characteristics of the study population, n (%).**

|                                  | Men (n = 1,197) | Women (n = 1,272) | p-value |
|----------------------------------|-----------------|-------------------|---------|
| Age group                        |                 |                   | <0.001  |
| 30s                              | 179 (15.0)      | 91 (7.2)          |         |
| 40s                              | 278 (23.2)      | 205 (16.1)        |         |
| 50s                              | 360 (30.1)      | 414 (32.6)        |         |
| 60s                              | 380 (31.8)      | 562 (44.2)        |         |
| Smoking                          | 504 (42.1)      | 51 (4.0)          | <0.001  |
| Heavy drinking                   | 512 (42.8)      | 100 (7.9)         | <0.001  |
| Poor diet                        | 551 (46.0)      | 272 (21.4)        | <0.001  |
| Physical inactivity              | 641 (53.6)      | 724 (56.9)        | 0.100   |
| Number of lifestyle risk factors |                 |                   | <0.001  |
| 4                                | 77 (6.4)        | 3 (0.2)           |         |
| 3                                | 238 (19.9)      | 24 (1.9)          |         |
| 2                                | 438 (36.6)      | 202 (15.9)        |         |
| 1                                | 310 (25.9)      | 659 (51.8)        |         |
| 0                                | 134 (11.2)      | 384 (30.2)        |         |
| Household income in quartiles    |                 |                   | <0.001  |
| Q1 (Lowest)                      | 270 (22.9)      | 385 (30.5)        |         |
| Q2                               | 320 (27.1)      | 335 (26.6)        |         |
| Q3                               | 292 (24.8)      | 311 (24.6)        |         |
| Q4 (Highest)                     | 298 (25.3)      | 231 (18.3)        |         |
| Education                        |                 |                   | <0.001  |
| Primary school                   | 188 (15.7)      | 599 (47.2)        |         |
| Middle school                    | 192 (16.1)      | 219 (17.2)        |         |
| High School                      | 404 (33.8)      | 326 (25.7)        |         |
| College or more                  | 411 (34.4)      | 125 (9.8)         |         |
| Married status                   |                 |                   | <0.001  |
| Living alone                     | 121 (10.1)      | 266 (20.9)        |         |
| Living with partner              | 1,074 (89.9)    | 1,004 (79.1)      |         |
| Economic status                  |                 |                   | <0.001  |
| Active                           | 978 (82.4)      | 620 (48.9)        |         |
| Inactive                         | 209 (17.6)      | 649 (51.1)        |         |

<https://doi.org/10.1371/journal.pone.0174567.t001>

Table 4 presents the results of the multinomial logistic regression model, with the number of lifestyle risk factors as the dependent variable. The table shows that male and younger age groups were much more likely to have a higher number of lifestyle risk factors. Those who were low educated or living alone were also more likely to have multiple lifestyle risk factors, while other important socioeconomic factors such as income and economic status were not significantly associated with the number of lifestyle risk factors.

## Discussion

In the present study we investigated the clustering of these four major lifestyle risk factors such as smoking, heavy drinking, poor diet, and physical inactivity among a representative sample of adult Korean population with metabolic syndrome. Most previous studies on clustering of risk factors have examined the clustering of metabolic risk factors [18–25] and not lifestyle risk factors.

**Table 2. Prevalence of combinations of four lifestyle risk factors.**

| No. | S | A | D | P | Men, n = 1,197 |       |      | Women, n = 1,272 |       |      |
|-----|---|---|---|---|----------------|-------|------|------------------|-------|------|
|     |   |   |   |   | N              | O (%) | O/E  | N                | O (%) | O/E  |
| 4   | + | + | + | + | 77             | 6.43  | 1.45 | 3                | 0.24  | 6.24 |
| 3   | + | + | + | - | 56             | 4.68  | 1.22 | 2                | 0.16  | 5.49 |
|     | + | + | - | + | 80             | 6.68  | 1.28 | 3                | 0.24  | 1.70 |
|     | + | - | + | + | 51             | 4.26  | 0.72 | 3                | 0.24  | 0.54 |
|     | - | + | + | + | 51             | 4.26  | 0.70 | 16               | 1.26  | 1.36 |
| 2   | + | + | - | - | 47             | 3.93  | 0.87 | 5                | 0.39  | 3.64 |
|     | + | - | + | - | 50             | 4.18  | 0.81 | 6                | 0.47  | 1.38 |
|     | + | - | - | + | 90             | 7.52  | 1.08 | 18               | 1.42  | 0.86 |
|     | - | + | + | - | 75             | 6.27  | 1.19 | 10               | 0.79  | 1.13 |
|     | - | + | - | + | 76             | 6.35  | 0.89 | 30               | 2.36  | 0.70 |
|     | - | - | + | + | 100            | 8.35  | 1.02 | 133              | 10.46 | 0.97 |
| 1   | + | - | - | - | 53             | 4.43  | 0.73 | 11               | 0.86  | 0.69 |
|     | - | + | - | - | 50             | 4.18  | 0.67 | 31               | 2.44  | 0.95 |
|     | - | - | + | - | 91             | 7.60  | 1.08 | 99               | 7.78  | 0.95 |
|     | - | - | - | + | 116            | 9.69  | 1.01 | 518              | 40.72 | 1.03 |
| 0   | - | - | - | - | 134            | 11.19 | 1.35 | 384              | 30.19 | 1.01 |

Note: S, smoking; A, heavy drinking; D, poor diet; P, physical inactivity; O, observed; E, expected.

<https://doi.org/10.1371/journal.pone.0174567.t002>

This study shows that the four lifestyle risk factors tended to cluster in specific multiple combinations. Smoking and heavy drinking was clustered, heavy drinking and poor diet were clustered, and smoking and physical inactivity were also clustered. These clustering patterns were extensively reported earlier for general population [8,9,26]. But this study failed to show the clustering of heavy drinking and high physical inactivity in the metabolic syndrome patients, like earlier reports for general population which showed clustering of heavy drinking and high physical activity [8,9].

It appeared that multiple lifestyle risk factors were more prevalent among men, low educated people and singles. High education may have positive effect on reducing number of having lifestyle risk factors [27,28]. Subjects educated above high school have lower possibility of having three or four risk factors than subjects with primary or middle school education. Female participants tended to be passive in terms of health behaviors in that they do not engage in smoking, heavy drinking, poor diet but as well as physical activity. About 40% of females were the case. This finding is consistent with the previous results that general Korean

**Table 3. Prevalence and Prevalence Odds Ratio (POR) of combinations of two lifestyle risk factors.**

|                                    | Men        |      |         | Women      |      |         |
|------------------------------------|------------|------|---------|------------|------|---------|
|                                    | P (%)      | POR  | P value | P (%)      | POR  | P value |
| Smoking/Heavy drinking             | 260 (21.7) | 1.86 | <0.001  | 13 (1.0)   | 4.46 | <0.001  |
| Smoking/Poor diet                  | 234 (19.6) | 1.03 | 0.814   | 14 (1.1)   | 1.41 | 0.283   |
| Smoking/Physical inactivity        | 298 (24.9) | 1.48 | 0.001   | 27 (2.1)   | 0.85 | 0.559   |
| Heavy drinking/Poor diet           | 259 (21.6) | 1.38 | 0.006   | 331 (2.4)  | 1.74 | 0.016   |
| Heavy drinking/Physical inactivity | 284 (23.7) | 1.14 | 0.250   | 52 (4.1)   | 0.81 | 0.302   |
| Poor diet/Physical inactivity      | 279 (23.3) | 0.80 | 0.062   | 155 (12.2) | 1.00 | 0.980   |

Note: POR, prevalence odds ratio.

<https://doi.org/10.1371/journal.pone.0174567.t003>

**Table 4. Odds ratios (OR) and 95% confidence intervals (CI) of predictors of the number of lifestyle risk factors.**

|                                      | 1    |           | 2    |           | 3     |              | 4     |              |
|--------------------------------------|------|-----------|------|-----------|-------|--------------|-------|--------------|
|                                      | OR   | 95% CI    | OR   | 95% CI    | OR    | 95% CI       | OR    | 95% CI       |
| Sex (women)                          |      |           |      |           |       |              |       |              |
| Men                                  | 1.40 | 1.07–1.84 | 6.54 | 4.84–8.86 | 27.11 | 16.24–45.224 | 73.77 | 21.79–249.78 |
| Age group (60+)                      |      |           |      |           |       |              |       |              |
| 50s                                  | 1.08 | 0.83–1.40 | 1.51 | 1.11–2.07 | 2.27  | 1.42–3.631   | 6.42  | 2.45–16.83   |
| 40s                                  | 1.72 | 1.17–2.54 | 3.09 | 2.00–4.77 | 8.13  | 4.63–14.28   | 24.94 | 8.74–71.14   |
| 30s                                  | 1.36 | 0.81–2.28 | 4.31 | 2.52–7.40 | 9.07  | 4.64–17.73   | 17.75 | 5.47–57.56   |
| Income (Q1)                          |      |           |      |           |       |              |       |              |
| Q2                                   | 0.91 | 0.68–1.24 | 1.17 | 0.83–1.65 | 0.75  | 0.46–1.21    | 1.09  | 0.54–2.21    |
| Q3                                   | 0.95 | 0.70–1.29 | 0.90 | 0.63–1.29 | 0.81  | 0.49–1.30    | 0.54  | 0.24–1.21    |
| Q4                                   | 0.93 | 0.67–1.30 | 1.02 | 0.70–1.51 | 0.99  | 0.60–1.62    | 0.92  | 0.43–1.98    |
| Education (primary)                  |      |           |      |           |       |              |       |              |
| Middle school                        | 0.90 | 0.65–1.24 | 1.05 | 0.72–1.54 | 0.89  | 0.49–1.60    | 0.58  | 0.22–1.55    |
| High School                          | 0.92 | 0.67–1.26 | 0.99 | 0.68–1.42 | 0.99  | 0.58–1.69    | 0.44  | 0.18–1.07    |
| College or more                      | 0.82 | 0.54–1.24 | 0.60 | 0.38–0.97 | 0.58  | 0.31–1.09    | 0.55  | 0.22–1.39    |
| Married status (living with partner) |      |           |      |           |       |              |       |              |
| Living alone                         | 0.98 | 0.72–1.31 | 1.43 | 1.00–2.03 | 1.64  | 0.99–2.71    | 2.20  | 1.05–4.63    |
| Economic status (active)             |      |           |      |           |       |              |       |              |
| Inactive                             | 0.95 | 0.75–1.20 | 0.85 | 0.64–1.13 | 0.63  | 0.39–1.00    | 0.69  | 0.30–1.59    |

Note: Reference category for the outcome variable is “none” lifestyle risk factor. Reference group is in parenthesis.

<https://doi.org/10.1371/journal.pone.0174567.t004>

women tended not to partake in smoking, drinking, and physical activity at the same time [26]. Likewise, male participants tended to smoke and drink heavily, also supporting existing literature [26]. Males with metabolic syndrome were much more likely than their female counterparts to engage in multiple unhealthy behaviors. This results show that there are vulnerable groups within the adult population that have more risky lifestyles.

The crucial management approach for metabolic syndrome is not drug treatment, but lifestyle change, that is to say, making healthier lifestyle behaviors. The National Cholesterol Education Panel Adult Treatment Panel recommended lifestyle change as the initial management for metabolic syndrome [1,29]. Studies have shown that short-term intensive lifestyle intervention programs are effective at controlling risk factors for metabolic syndrome. For example, diet and exercise programs significantly decrease biochemical indices of metabolic syndrome, weight, and waist circumference [30–32]. A successful lifestyle intervention for the metabolic syndrome depends much on the patient’s motivation to change their unhealthy behaviors [33]. Naturally, the more closely a patient adheres an intervention program, the greater the improvement in level of his or her lifestyle risk factors [34].

Followings are some helpful implications for more effective lifestyle intervention targeting metabolic syndrome from this study. First, multiple-behavior interventions should be provided rather than single-behavior interventions [35,36] because health behaviors are clustered. This approach can be more effective and efficient at achieving intervention goal [37]. Second, interventions need to focus on modifying smoking and heavy drinking habits. People who smoke and/or drink heavily tend to have other bad lifestyle habits. In other words, controlling for these two factors may prevent other bad habits. Third, men, younger age groups, low educated and singles should be targeted for multiple-behavior interventions because these groups appear to be relatively at high risk. Fourth, more tailored intervention should be developed for women with metabolic syndrome since most of female participants in this study have relatively

good health habits. Further study is needed to identify behavior pattern among women with metabolic syndrome more precisely.

The most important limitation in the study is that as cut-off points of lifestyle risk factors were used that are in accordance with KNHANES, it may be difficult to generalize our findings to different settings and populations. It should be noticed that the common practice of dichotomizing lifestyle factors may have implications for the findings [8,38].

Generally, prevalence ratio (PR) is regarded more appropriate measure than POR, but the reason we used POR instead of PR was that only POR has the property of reciprocity (changing reference category of a dichotomized variable will yield 'reciprocal' estimates) which is needed for our analyses [39]. In fact, previous researches with similar study design used POR, too [8–10,17].

In the present study we examined the clustering of four major lifestyle risk factors among a representative sample of adult Korean population with metabolic syndrome. This study shows that the four lifestyle risk factors clustered in specific multiple combinations and there are specific vulnerable groups that have more lifestyle risk factors. Some helpful implications can be drawn from the knowledge of clustering pattern of lifestyle risk factors for more effective intervention program targeting metabolic syndrome.

## Author Contributions

**Conceptualization:** YHL.

**Data curation:** SH.

**Formal analysis:** HRC.

**Investigation:** SH HRC YHL.

**Methodology:** SH YHL.

**Resources:** YHL.

**Supervision:** YHL.

**Writing – original draft:** SH HRC.

**Writing – review & editing:** SH HRC YHL.

## References

1. Grundy SM, Cleeman JI, Daniels SR, Donato KA, Eckel RH, Franklin BA, et al. (2005) Diagnosis and management of the metabolic syndrome: an American Heart Association/National Heart, Lung, and Blood Institute Scientific Statement. *Circulation* 112: 2735–2752. <https://doi.org/10.1161/CIRCULATIONAHA.105.169404> PMID: 16157765
2. Ford ES (2005) Risks for all-cause mortality, cardiovascular disease, and diabetes associated with the metabolic syndrome: a summary of the evidence. *Diabetes Care* 28: 1769–1778. PMID: 15983333
3. Grundy SM, Brewer HB Jr., Cleeman JI, Smith SC Jr., Lenfant C, American Heart A, et al. (2004) Definition of metabolic syndrome: Report of the National Heart, Lung, and Blood Institute/American Heart Association conference on scientific issues related to definition. *Circulation* 109: 433–438. <https://doi.org/10.1161/01.CIR.0000111245.75752.C6> PMID: 14744958
4. Choo J, Yoon SJ, Ryu H, Park MS, Lee HS, Park YM, et al. (2016) The Seoul Metropolitan Lifestyle Intervention Program and Metabolic Syndrome Risk: A Retrospective Database Study. *Int J Environ Res Public Health* 13.
5. Jahangiry L, Shojaeizadeh D, Montazeri A, Najafi M, Mohammad K, Abbasalizad Farhangi M (2014) Modifiable lifestyle risk factors and metabolic syndrome: opportunities for a web-based preventive program. *J Res Health Sci* 14: 303–307. PMID: 25503288



6. McGinnis JM, Foegen WH (1993) Actual causes of death in the United States. *JAMA* 270: 2207–2212. PMID: [8411605](#)
7. Mokdad AH, Marks JS, Stroup DF, Gerberding JL (2004) Actual causes of death in the United States, 2000. *JAMA* 291: 1238–1245. <https://doi.org/10.1001/jama.291.10.1238> PMID: [15010446](#)
8. Poortinga W (2007) The prevalence and clustering of four major lifestyle risk factors in an English adult population. *Prev Med* 44: 124–128. <https://doi.org/10.1016/j.ypmed.2006.10.006> PMID: [17157369](#)
9. Schuit AJ, van Loon AJ, Tijhuis M, Ocke M (2002) Clustering of lifestyle risk factors in a general adult population. *Prev Med* 35: 219–224. PMID: [12202063](#)
10. Chou KL (2008) The prevalence and clustering of four major lifestyle risk factors in Hong Kong Chinese older adults. *J Aging Health* 20: 788–803. <https://doi.org/10.1177/0898264308321082> PMID: [18562762](#)
11. Kandula NR, Dave S, De Chavez PJ, Bharucha H, Patel Y, Seguil P, et al. (2015) Translating a heart disease lifestyle intervention into the community: the South Asian Heart Lifestyle Intervention (SAHELI) study; a randomized control trial. *BMC Public Health* 15: 1064. <https://doi.org/10.1186/s12889-015-2401-2> PMID: [26475629](#)
12. Kandula NR, Patel Y, Dave S, Seguil P, Kumar S, Baker DW, et al. (2013) The South Asian Heart Lifestyle Intervention (SAHELI) study to improve cardiovascular risk factors in a community setting: design and methods. *Contemp Clin Trials* 36: 479–487. <https://doi.org/10.1016/j.cct.2013.09.007> PMID: [24060673](#)
13. Kweon S, Kim Y, Jang MJ, Kim Y, Kim K, Choi S, et al. (2014) Data resource profile: the Korea National Health and Nutrition Examination Survey (KNHANES). *Int J Epidemiol* 43: 69–77. <https://doi.org/10.1093/ije/dyt228> PMID: [24585853](#)
14. Kim Y (2014) The Korea National Health and Nutrition Examination Survey (KNHANES): current status and challenges. *Epidemiol Health* 36: e2014002. <https://doi.org/10.4178/epih/e2014002> PMID: [24839580](#)
15. Kim Y, Park I, Kang M (2013) Convergent validity of the international physical activity questionnaire (IPAQ): meta-analysis. *Public Health Nutr* 16: 440–452. <https://doi.org/10.1017/S1368980012002996> PMID: [22874087](#)
16. Lee PH, Macfarlane DJ, Lam TH, Stewart SM (2011) Validity of the International Physical Activity Questionnaire Short Form (IPAQ-SF): a systematic review. *Int J Behav Nutr Phys Act* 8: 115. <https://doi.org/10.1186/1479-5868-8-115> PMID: [22018588](#)
17. Lee Y, Back JH, Kim J, Byeon H, Kim S, Ryu M (2012) Clustering of multiple healthy lifestyles among older Korean adults living in the community. *Geriatr Gerontol Int* 12: 515–523. <https://doi.org/10.1111/j.1447-0594.2011.00788.x> PMID: [22212559](#)
18. Chen W, Bao W, Begum S, Elkasabany A, Srinivasan SR, Berenson GS (2000) Age-related patterns of the clustering of cardiovascular risk variables of syndrome X from childhood to young adulthood in a population made up of black and white subjects: the Bogalusa Heart Study. *Diabetes* 49: 1042–1048. PMID: [10866058](#)
19. Milligan RA, Thompson C, Vandongen R, Beilin LJ, Burke V (1995) Clustering of cardiovascular risk factors in Australian adolescents: association with dietary excesses and deficiencies. *J Cardiovasc Risk* 2: 515–523. PMID: [8665370](#)
20. Yu Y, Song Y (2015) Three clustering patterns among metabolic syndrome risk factors and their associations with dietary factors in Korean adolescents: based on the Korea National Health and Nutrition Examination Survey of 2007–2010. *Nutr Res Pract* 9: 199–206. <https://doi.org/10.4162/nrp.2015.9.2.199> PMID: [25861428](#)
21. Song S, Paik HY, Song WO, Park M, Song Y (2014) Three distinct clustering patterns in metabolic syndrome abnormalities are differentially associated with dietary factors in Korean adults. *Nutr Res* 34: 383–390. <https://doi.org/10.1016/j.nutres.2014.03.004> PMID: [24916551](#)
22. Melka MG, Abrahamowicz M, Leonard GT, Perron M, Richer L, Veillette S, et al. (2013) Clustering of the metabolic syndrome components in adolescence: role of visceral fat. *PLoS One* 8: e82368. <https://doi.org/10.1371/journal.pone.0082368> PMID: [24376531](#)
23. Nazzaro P, Schirosi G, Mezzapesa D, Petruzzellis M, Pascasio L, Serio G, et al. (2013) Effect of clustering of metabolic syndrome factors on capillary and cerebrovascular impairment. *Eur J Intern Med* 24: 183–188. <https://doi.org/10.1016/j.ejim.2012.08.017> PMID: [23041467](#)
24. Hong TK, Trang NH, Dibley MJ (2012) Prevalence of metabolic syndrome and factor analysis of cardiovascular risk clustering among adolescents in Ho Chi Minh City, Vietnam. *Prev Med* 55: 409–411. <https://doi.org/10.1016/j.ypmed.2012.09.002> PMID: [22975412](#)



25. Tsai CH, Li TC, Lin CC, Tsay HS (2011) Factor analysis of modifiable cardiovascular risk factors and prevalence of metabolic syndrome in adult Taiwanese. *Endocrine* 40: 256–264. <https://doi.org/10.1007/s12020-011-9466-1> PMID: 21499818
26. Kang K, Sung J, Kim CY (2010) [High risk groups in health behavior defined by clustering of smoking, alcohol, and exercise habits: National Health and Nutrition Examination Survey]. *J Prev Med Public Health* 43: 73–83. <https://doi.org/10.3961/jpmph.2010.43.1.73> PMID: 20185985
27. Chung W, Lee S, Lim SJ, Kim J (2016) Modifying effects of education on the association between lifestyle behaviors and the risk of obesity: evidence from South Korea. *BMC Public Health* 16: 1100. <https://doi.org/10.1186/s12889-016-3776-4> PMID: 27765022
28. Mirowsky J, Ross CE (2015) Education, Health, and the Default American Lifestyle. *J Health Soc Behav* 56: 297–306. <https://doi.org/10.1177/0022146515594814> PMID: 26272989
29. Grundy SM, Hansen B, Smith SC Jr., Cleeman JI, Kahn RA, American Heart A, et al. (2004) Clinical management of metabolic syndrome: report of the American Heart Association/National Heart, Lung, and Blood Institute/American Diabetes Association conference on scientific issues related to management. *Circulation* 109: 551–556. <https://doi.org/10.1161/01.CIR.0000112379.88385.67> PMID: 14757684
30. Singh RB, Singh NK, Rastogi SS, Mani UV, Niaz MA (1993) Effects of diet and lifestyle changes on atherosclerotic risk factors after 24 weeks on the Indian Diet Heart Study. *Am J Cardiol* 71: 1283–1288. PMID: 8498367
31. Anderssen SA, Hjermann I, Urdal P, Torjesen PA, Holme I (1996) Improved carbohydrate metabolism after physical training and dietary intervention in individuals with the "atherothrombogenic syndrome". Oslo Diet and Exercise Study (ODES). A randomized trial. *J Intern Med* 240: 203–209. PMID: 8918511
32. Watkins LL, Sherwood A, Feinglos M, Hinderliter A, Babyak M, Gullette E, et al. (2003) Effects of exercise and weight loss on cardiac risk factors associated with syndrome X. *Arch Intern Med* 163: 1889–1895. <https://doi.org/10.1001/archinte.163.16.1889> PMID: 12963561
33. Bassi N, Karagodin I, Wang S, Vassallo P, Priyanath A, Massaro E, et al. (2014) Lifestyle modification for metabolic syndrome: a systematic review. *Am J Med* 127: 1242 e1241–1210.
34. Fappa E, Yannakoulia M, Pitsavos C, Skoumas I, Valourdou S, Stefanadis C (2008) Lifestyle intervention in the management of metabolic syndrome: could we improve adherence issues? *Nutrition* 24: 286–291. <https://doi.org/10.1016/j.nut.2007.11.008> PMID: 18201869
35. Nigg CR, Allegrante JP, Ory M (2002) Theory-comparison and multiple-behavior research: common themes advancing health behavior research. *Health Educ Res* 17: 670–679. PMID: 12408211
36. Goldstein MG, Whitlock EP, DePue J, Planning Committee of the Addressing Multiple Behavioral Risk Factors in Primary Care P (2004) Multiple behavioral risk factor interventions in primary care. Summary of research evidence. *Am J Prev Med* 27: 61–79. <https://doi.org/10.1016/j.amepre.2004.04.023> PMID: 15275675
37. Atkins D, Clancy C (2004) Multiple risk factors interventions. Are we up to the challenge? *Am J Prev Med* 27: 102–103. <https://doi.org/10.1016/j.amepre.2004.04.016> PMID: 15275678
38. MacCallum RC, Zhang S, Preacher KJ, Rucker DD (2002) On the practice of dichotomization of quantitative variables. *Psychol Methods* 7: 19–40. PMID: 11928888
39. Tamhane AR, Westfall AO, Burkholder GA, Cutter GR (2016) Prevalence odds ratio versus prevalence ratio: choice comes with consequences. *Stat Med* 35: 5730–5735. <https://doi.org/10.1002/sim.7059> PMID: 27460748
